# Supplementary material
Source: PubMed Central journal article supplement (PMC3941699)
Supplement: NIHMS79240-supplement-01.pdf [file NIHMS79240-supplement-01.pdf]

Supplemental Table A. Regions demonstrating differential BOLD Responses during early and late phases of successful extinction.

| Region                            | R/L | BA | x   | y   | z   | Volume |
|-----------------------------------|-----|----|-----|-----|-----|--------|
| <b>Phase:</b>                     |     |    |     |     |     |        |
| <u>Early &gt; late</u>            |     |    |     |     |     |        |
| Medial frontal gyrus              | R   | 6  | 4   | 34  | 42  | 4973   |
| Middle frontal gyrus              | L   | 9  | -35 | 20  | 29  | 4151   |
|                                   | R   | 9  | 42  | 13  | 43  | 2045   |
| Insula/claustrium                 | L   | 13 | -27 | 20  | 4   | 1919   |
| Inferior parietal lobule          | R   | 7  | 40  | -70 | 47  | 940    |
|                                   | L   | 40 | -41 | -62 | 45  | 762    |
| Superior temporal gyrus           | R   | 38 | 52  | 18  | -7  | 648    |
| Precuneus                         | R   | 7  | 3   | -75 | 34  | 595    |
| <b>Pair:</b>                      |     |    |     |     |     |        |
| <u>Extinction &gt; control</u>    |     |    |     |     |     |        |
| Medial and superior frontal gyrus | R   | 10 | 9   | 70  | -1  | 369    |
| Inferior frontal gyrus            | R   | 47 | 35  | 33  | -17 | 493    |
| <u>Extinction &lt; control</u>    |     |    |     |     |     |        |
| Anterior cingulate cortex         | R   | 24 | 13  | 36  | 3   | 164*   |
| <b>Response type x Phase:</b>     |     |    |     |     |     |        |
| Insula                            | L   | 13 | -37 | -2  | -10 | 555    |
| Inferior frontal gyrus            | L   | 44 | -51 | 20  | 12  | 510    |
| <b>Response x Pair:</b>           |     |    |     |     |     |        |
| Precentral gyrus                  | L   | 4  | -62 | -10 | 7   | 692    |
| <b>Response x Phase x Pair:</b>   |     |    |     |     |     |        |
| Insula                            | L   | 13 | -43 | -6  | 0   | 714    |

MNI coordinates of peak activation. Regions and Brodmann area (BA) according to Talaraich Daemon Atlas. All regions significant at  $p < 0.05$  corrected for multiple comparisons except \*.
