# Supplementary material
Source: PubMed Central journal article supplement (PMC3941699)
Supplement: NIHMS79240-supplement-02.pdf [file NIHMS79240-supplement-02.pdf]

**Supplemental Table 2.** Regions Demonstrating Increased Responses  
to Hits vs. Avoidances during Correct Responses

**Hits > Avoidance**

| Region                                                                   | L/R | BA    | x   | y   | z   | cluster<br>size mm3 |
|--------------------------------------------------------------------------|-----|-------|-----|-----|-----|---------------------|
| p<0.001                                                                  |     |       |     |     |     |                     |
| temp-occip                                                               |     |       |     |     |     |                     |
| temporal-occipital cortex/ thalamus/<br>caudate/ dorsal cingulate cortex | L/R |       |     |     |     | 37851               |
| superior parietal lobule                                                 | R   | 7     | 37  | -66 | 58  | 11676               |
| superior parietal lobule                                                 | L   | 7     | -27 | -70 | 58  | 5791                |
| inferior frontal gyrus                                                   | R   | 9     | 47  | 4   | 30  | 4960                |
| middle frontal gyrus                                                     | R   | 11    | 32  | 40  | -19 | 2077                |
| precentral gyrus                                                         | L   | 4     | -32 | -28 | 72  | 2002                |
| inferior frontal gyrus                                                   | R   | 13/47 | 15  | 5   | -17 | 1138                |
| middle frontal gyrus                                                     | R   | 46    | 47  | 30  | 26  | 226*                |
| superior frontal gyrus                                                   | R   | 6     | 6   | 18  | 59  | 216*                |
| anterior cingulate cortex                                                | R   | 32    | 8   | 36  | 22  | 124*                |

MNI coordinates of peak activation. Regions and Brodmann area (BA) according to Talarach Daemon Atlas. All clusters survive multiple comparison correction at p<0.05 except \*.
